# Supplementary material for: Expression profiling and intracellular localization studies of the novel Proline-, Histidine-, and Glycine-rich protein 1 suggest an essential role in gastro-intestinal epithelium and a potential clinical application in colorectal cancer diagnostics
Source: PubMed Central journal article supplement (PMC5803922; doi:10.1186/s12876-018-0752-8), 2018-02-07
Supplement: 12876_2018_752_MOESM2_ESM.pdf [file 12876_2018_752_MOESM2_ESM.pdf]

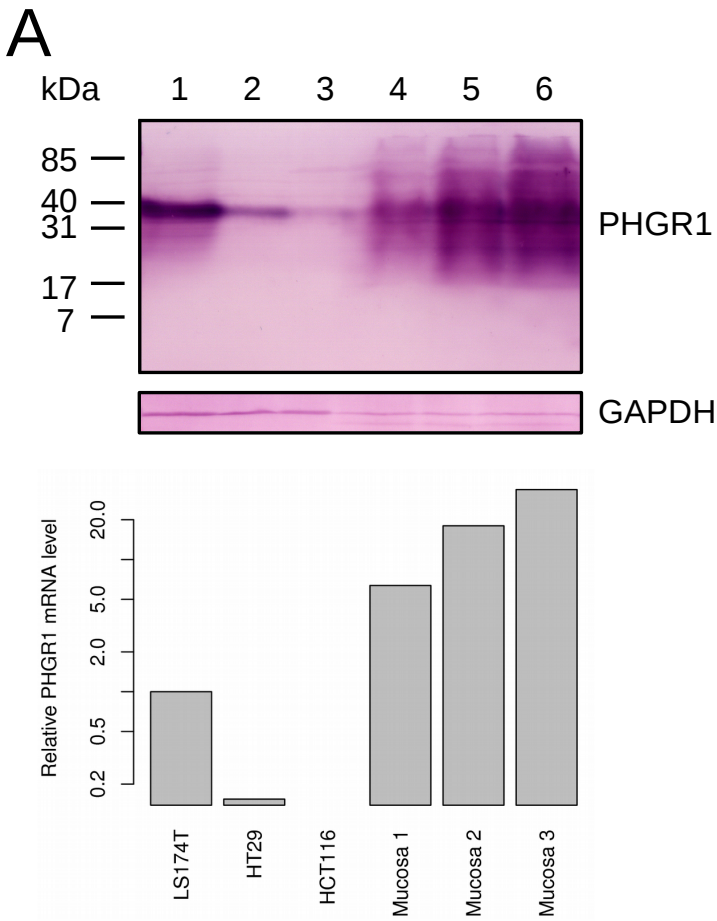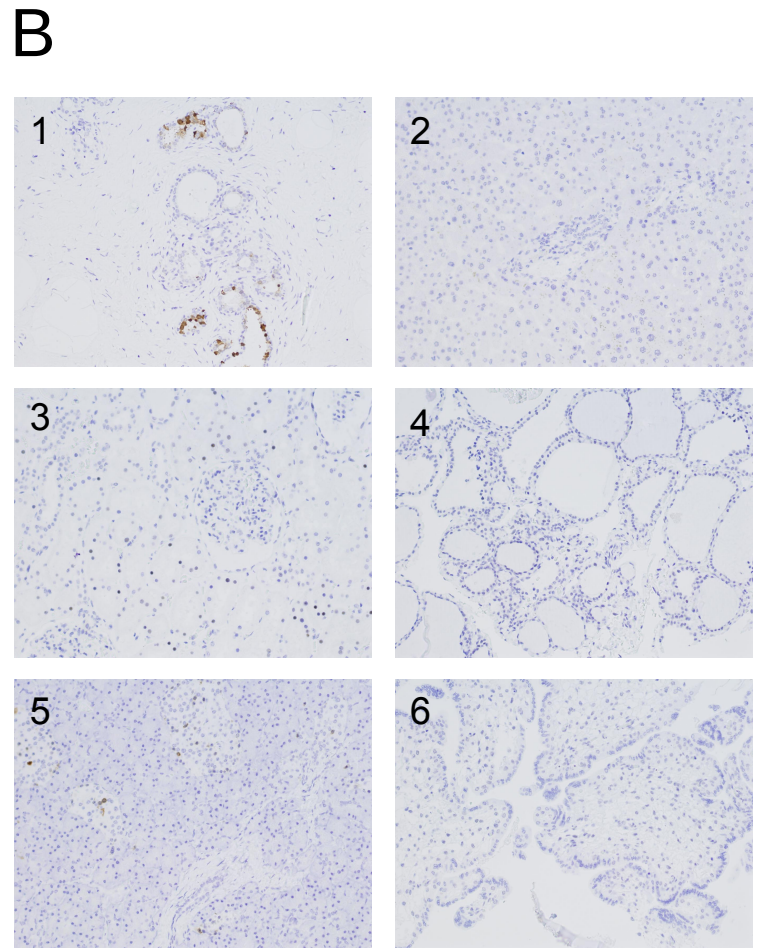

**Additional file 2: PHGR1 protein characterization.**

- A) The barplot shows relative PHGR1 mRNA levels in the same samples that was analyzed in figure 3A, reproduced above.
- B) Immunohistochemical staining of PHGR1 in normal breast (1), liver (2), kidney (3), thyroid (4), pancreas (5) and placenta (6).
