# Supplementary material for: Expression profiling and intracellular localization studies of the novel Proline-, Histidine-, and Glycine-rich protein 1 suggest an essential role in gastro-intestinal epithelium and a potential clinical application in colorectal cancer diagnostics
Source: Springer Nature journal article supplement (doi:10.1186/s12876-018-0752-8), 2018-02-07
Supplement: MOESM1 [file 15445836]

**A**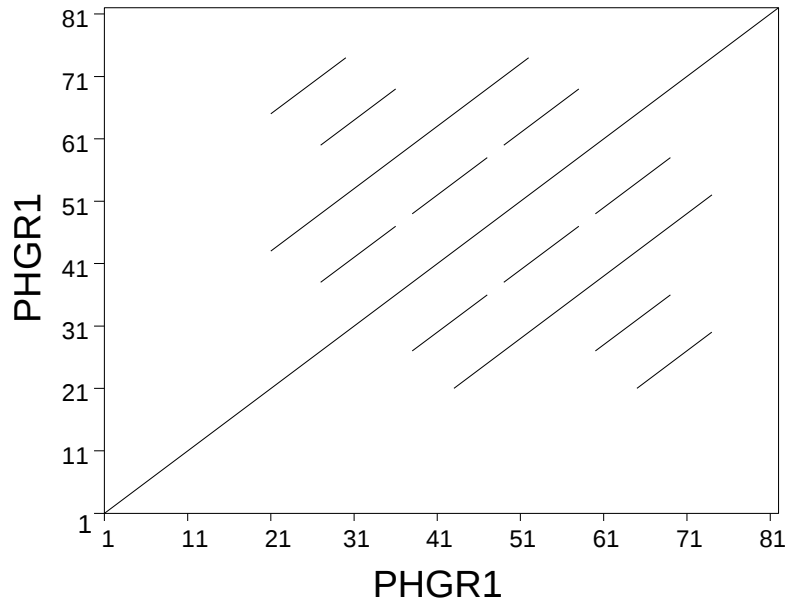**B**

1            10            20            30            40  
 MDPGPKGHCHCGGHGHPGGH CGPPPGHGPGPCGPPPHHGPGP  
 .....

50            60            70            80  
CGPPPGHGPGPCGPPPHHGPGPCGPPPGHGPGHPPPGPHH  
 .....

**Additional file 1: PHGR1 peptide sequence analysis.**

A) Dotplot analysis of the human PHGR1 peptide sequence against itself. The window size was 10 residues.

B) Human PHGR1 peptide sequence. The five repeats are shown by colored boxes and underlining. The two variants of the repeated unit are indicated by different color and underlining.
