# Supplementary material for: Expression profiling and intracellular localization studies of the novel Proline-, Histidine-, and Glycine-rich protein 1 suggest an essential role in gastro-intestinal epithelium and a potential clinical application in colorectal cancer diagnostics
Source: Springer Nature journal article supplement (doi:10.1186/s12876-018-0752-8), 2018-02-07
Supplement: MOESM5 [file 15445836]

## Additional file 5: Upregulated genes

| No | ILMN_Gene  | Probe_ID     | Score <sup>1</sup> | logFCmean <sup>2</sup> | adjPmean |
|----|------------|--------------|--------------------|------------------------|----------|
| 1  | LOC645553  | ILMN_1676712 | -1,84              | -1,95                  | 3,07E-10 |
| 2  | LOC644760  | ILMN_1661743 | -1,50              | -1,57                  | 2,50E-08 |
| 3  | HS.579631  | ILMN_1881909 | -1,36              | -1,57                  | 1,33E-05 |
| 4  | LOC147645  | ILMN_1733084 | -1,28              | -1,32                  | 2,64E-09 |
| 5  | EMP3       | ILMN_1765446 | -1,25              | -1,53                  | 4,71E-08 |
| 6  | MGC59937   | ILMN_1814106 | -1,25              | -1,36                  | 1,97E-07 |
| 7  | GDPD3      | ILMN_1731870 | -1,15              | -1,47                  | 1,06E-08 |
| 8  | MAPK3      | ILMN_1812747 | -1,05              | -1,25                  | 1,49E-09 |
| 9  | HSPA5      | ILMN_1773865 | -1,00              | -1,09                  | 3,04E-08 |
| 10 | TCN1       | ILMN_1768469 | -0,98              | -1,05                  | 4,39E-08 |
| 11 | DICER1     | ILMN_1686725 | -0,96              | -0,96                  | 5,64E-08 |
| 12 | TMPRSS4    | ILMN_1676727 | -0,94              | -1,04                  | 2,31E-07 |
| 13 | SGPL1      | ILMN_1761531 | -0,93              | -0,98                  | 4,94E-06 |
| 14 | LOC205251  | ILMN_1693685 | -0,89              | -1,02                  | 8,62E-08 |
| 15 | AKR1B1     | ILMN_1701731 | -0,88              | -0,89                  | 4,85E-08 |
| 16 | ST3GAL4    | ILMN_1750086 | -0,86              | -0,86                  | 1,56E-06 |
| 17 | TNNT1      | ILMN_1717297 | -0,85              | -0,90                  | 6,22E-06 |
| 18 | MGC15523   | ILMN_1759743 | -0,84              | -0,88                  | 1,35E-06 |
| 19 | ARL2       | ILMN_1787879 | -0,81              | -1,06                  | 5,71E-05 |
| 20 | FAM65A     | ILMN_1680037 | -0,80              | -0,81                  | 1,66E-05 |
| 21 | ACTR1A     | ILMN_1792314 | -0,79              | -0,80                  | 7,31E-06 |
| 22 | SLC2A1     | ILMN_1809256 | -0,78              | -0,96                  | 2,30E-08 |
| 23 | SLC22A18AS | ILMN_1691048 | -0,77              | -0,77                  | 7,66E-08 |
| 24 | ERP27      | ILMN_1655261 | -0,74              | -0,79                  | 2,63E-07 |
| 25 | BAD        | ILMN_1738652 | -0,72              | -0,93                  | 2,73E-06 |
| 26 | CASZ1      | ILMN_1655191 | -0,70              | -0,99                  | 8,36E-06 |
| 27 | TINAGL1    | ILMN_1807169 | -0,70              | -0,87                  | 2,69E-05 |
| 28 | TBC1D22B   | ILMN_1723475 | -0,69              | -0,78                  | 1,28E-07 |
| 29 | RHOC       | ILMN_1673305 | -0,69              | -0,73                  | 1,42E-06 |
| 30 | SLC44A2    | ILMN_1771987 | -0,69              | -0,72                  | 5,10E-06 |
| 31 | TAF13      | ILMN_1712561 | -0,68              | -0,71                  | 4,09E-05 |
| 32 | M-RIP      | ILMN_1774547 | -0,67              | -0,80                  | 6,80E-07 |
| 33 | ARID3A     | ILMN_1670130 | -0,67              | -0,80                  | 9,14E-06 |
| 34 | WFS1       | ILMN_1759023 | -0,67              | -0,89                  | 1,58E-04 |
| 35 | NRBP1      | ILMN_1670096 | -0,67              | -0,79                  | 8,84E-07 |
| 36 | LASS2      | ILMN_1726108 | -0,66              | -0,67                  | 1,02E-06 |
| 37 | MTMR11     | ILMN_1698246 | -0,65              | -0,74                  | 1,13E-07 |
| 38 | RNF149     | ILMN_1665877 | -0,63              | -0,69                  | 2,89E-07 |
| 39 | SFTPG      | ILMN_1703864 | -0,63              | -0,72                  | 1,17E-05 |
| 40 | TLN1       | ILMN_1696643 | -0,62              | -0,68                  | 2,32E-05 |
| 41 | CBR3       | ILMN_1652237 | -0,62              | -0,73                  | 6,59E-07 |
| 42 | IGFL2      | ILMN_1745238 | -0,62              | -0,79                  | 1,26E-05 |
| 43 | CTSL1      | ILMN_1812995 | -0,62              | -0,66                  | 2,55E-06 |
| 44 | SLC25A44   | ILMN_1810514 | -0,62              | -0,65                  | 8,81E-07 |
| 45 | DPEP1      | ILMN_1670779 | -0,62              | -0,63                  | 6,89E-06 |
| 46 | ARPC4      | ILMN_1803183 | -0,62              | -0,65                  | 1,24E-05 |

## Additional file 5: Upregulated genes

|    |           |              |       |       |          |
|----|-----------|--------------|-------|-------|----------|
| 47 | CST1      | ILMN_1753449 | -0,61 | -0,74 | 2,68E-07 |
| 48 | VAMP5     | ILMN_1809467 | -0,61 | -0,64 | 3,87E-06 |
| 49 | PRSS8     | ILMN_1796461 | -0,61 | -0,93 | 5,13E-05 |
| 50 | AIM1L     | ILMN_1669557 | -0,60 | -0,64 | 1,16E-06 |
| 51 | C11ORF9   | ILMN_1811437 | -0,60 | -0,65 | 6,67E-05 |
| 52 | TSPAN4    | ILMN_1720908 | -0,60 | -0,60 | 3,43E-04 |
| 53 | RFFL      | ILMN_1678010 | -0,60 | -0,65 | 1,76E-06 |
| 54 | NCKAP1    | ILMN_1747392 | -0,60 | -0,73 | 3,07E-05 |
| 55 | SH3GL1    | ILMN_1788062 | -0,60 | -0,75 | 3,24E-05 |
| 56 | PARD6B    | ILMN_1745154 | -0,60 | -0,62 | 3,97E-05 |
| 57 | COMT      | ILMN_1810941 | -0,59 | -0,60 | 7,15E-05 |
| 58 | BTBD16    | ILMN_1677684 | -0,59 | -0,68 | 1,13E-06 |
| 59 | SNX17     | ILMN_1732810 | -0,59 | -0,77 | 3,09E-06 |
| 60 | SLC46A3   | ILMN_1658639 | -0,59 | -0,70 | 6,78E-07 |
| 61 | CLPTM1    | ILMN_1665831 | -0,59 | -0,62 | 2,06E-06 |
| 62 | KLK11     | ILMN_1695924 | -0,59 | -0,62 | 3,72E-05 |
| 63 | RIPK3     | ILMN_1763763 | -0,59 | -0,65 | 4,96E-06 |
| 64 | RPPH1     | ILMN_1704056 | -0,58 | -0,70 | 8,47E-07 |
| 65 | SIRT7     | ILMN_1800418 | -0,58 | -0,74 | 1,71E-04 |
| 66 | CRB3      | ILMN_1754635 | -0,58 | -0,60 | 1,09E-04 |
| 67 | KIAA1539  | ILMN_1732609 | -0,58 | -0,72 | 4,44E-05 |
| 68 | LRP8      | ILMN_1677765 | -0,57 | -0,62 | 6,18E-05 |
| 69 | HS.137274 | ILMN_1892548 | -0,56 | -0,61 | 6,59E-06 |
| 70 | POLR3F    | ILMN_1673966 | -0,56 | -0,63 | 1,04E-06 |
| 71 | LHFPL2    | ILMN_1811077 | -0,56 | -0,57 | 7,80E-06 |
| 72 | RASSF3    | ILMN_1761026 | -0,56 | -0,62 | 1,99E-04 |
| 73 | ISCU      | ILMN_1735432 | -0,56 | -0,61 | 4,97E-06 |
| 74 | KLK3      | ILMN_1655426 | -0,55 | -0,71 | 6,00E-06 |
| 75 | TMEM120A  | ILMN_1654516 | -0,55 | -0,58 | 7,86E-05 |
| 76 | OKL38     | ILMN_1795963 | -0,55 | -0,63 | 1,68E-04 |
| 77 | CLIC1     | ILMN_1716360 | -0,55 | -0,66 | 1,28E-04 |
| 78 | KLK6      | ILMN_1777541 | -0,55 | -0,66 | 1,37E-05 |
| 79 | DHX32     | ILMN_1713688 | -0,55 | -0,56 | 1,36E-04 |
| 80 | TBX10     | ILMN_1682979 | -0,55 | -0,72 | 1,02E-05 |
| 81 | C19ORF6   | ILMN_1762439 | -0,55 | -0,59 | 1,32E-05 |
| 82 | FAM125A   | ILMN_1664587 | -0,55 | -0,78 | 1,32E-06 |
| 83 | LOC643722 | ILMN_1652649 | -0,54 | -0,69 | 2,35E-05 |
| 84 | MBOAT5    | ILMN_1805225 | -0,54 | -0,55 | 1,43E-05 |
| 85 | S100A3    | ILMN_1712545 | -0,54 | -1,23 | 7,42E-07 |
| 86 | S100A2    | ILMN_1725852 | -0,54 | -0,62 | 6,24E-06 |
| 87 | A4GALT    | ILMN_1735045 | -0,54 | -0,57 | 2,13E-05 |
| 88 | ISG20     | ILMN_1659913 | -0,54 | -0,99 | 6,45E-07 |
| 89 | MAP7D1    | ILMN_1733348 | -0,54 | -0,60 | 7,13E-06 |
| 90 | ELF4      | ILMN_1652082 | -0,54 | -0,81 | 1,15E-05 |
| 91 | BCAR1     | ILMN_1672596 | -0,54 | -0,71 | 1,17E-05 |
| 92 | CTDSP2    | ILMN_1692962 | -0,54 | -0,58 | 1,09E-05 |
| 93 | RAB10     | ILMN_1793433 | -0,53 | -0,54 | 1,00E-05 |

## Additional file 5: Upregulated genes

|     |           |              |       |       |          |
|-----|-----------|--------------|-------|-------|----------|
| 94  | NEU1      | ILMN_1763144 | -0,53 | -0,76 | 8,09E-06 |
| 95  | ATP6V0E1  | ILMN_1715635 | -0,53 | -0,59 | 8,80E-06 |
| 96  | DYNC1LI2  | ILMN_1783448 | -0,53 | -0,76 | 1,83E-06 |
| 97  | FAM127B   | ILMN_1686254 | -0,53 | -0,58 | 2,95E-06 |
| 98  | DNM3      | ILMN_1680928 | -0,53 | -0,98 | 2,62E-07 |
| 99  | C17ORF60  | ILMN_1747347 | -0,52 | -0,57 | 1,70E-06 |
| 100 | IDH1      | ILMN_1696432 | -0,52 | -0,56 | 1,75E-05 |
| 101 | KCTD20    | ILMN_1803476 | -0,52 | -0,68 | 6,96E-06 |
| 102 | HS.163264 | ILMN_1874613 | -0,52 | -0,80 | 2,14E-05 |
| 103 | ADFP      | ILMN_1660332 | -0,52 | -0,72 | 4,04E-07 |
| 104 | DCBLD2    | ILMN_1735499 | -0,52 | -1,06 | 1,05E-07 |
| 105 | C20ORF54  | ILMN_1740923 | -0,52 | -0,65 | 1,31E-05 |
| 106 | MAPK13    | ILMN_1749327 | -0,52 | -0,76 | 4,82E-05 |
| 107 | RALA      | ILMN_1755364 | -0,52 | -0,59 | 5,31E-06 |
| 108 | MORN2     | ILMN_1756826 | -0,51 | -0,55 | 1,05E-04 |
| 109 | APP       | ILMN_1678152 | -0,51 | -0,58 | 3,14E-06 |
| 110 | MAPRE3    | ILMN_1734290 | -0,51 | -0,68 | 3,12E-05 |
| 111 | CD68      | ILMN_1714861 | -0,51 | -0,63 | 7,06E-06 |
| 112 | KIAA1949  | ILMN_1732967 | -0,51 | -0,53 | 7,28E-05 |
| 113 | SENP5     | ILMN_1675501 | -0,50 | -0,65 | 9,67E-07 |
| 114 | GALR2     | ILMN_1733847 | -0,50 | -0,69 | 2,74E-05 |
| 115 | SERPINA5  | ILMN_1759910 | -0,50 | -0,54 | 6,99E-05 |
| 116 | NR1H2     | ILMN_1691345 | -0,50 | -0,67 | 1,73E-05 |
| 117 | CDS1      | ILMN_1801476 | -0,50 | -0,53 | 7,99E-06 |
| 118 | SF3B14    | ILMN_1703720 | -0,49 | -0,57 | 1,59E-05 |
| 119 | CDC42EP2  | ILMN_1652777 | -0,49 | -0,60 | 6,08E-06 |
| 120 | LOC652183 | ILMN_1778301 | -0,49 | -0,56 | 1,55E-05 |
| 121 | PEX26     | ILMN_1738065 | -0,49 | -0,64 | 8,35E-05 |
| 122 | MGC14376  | ILMN_1660841 | -0,49 | -0,88 | 3,06E-06 |
| 123 | MTMR12    | ILMN_1802831 | -0,49 | -0,72 | 2,07E-04 |
| 124 | TMEM62    | ILMN_1745807 | -0,49 | -0,49 | 1,78E-05 |
| 125 | BACE2     | ILMN_1669323 | -0,49 | -0,51 | 1,60E-04 |
| 126 | CDCP1     | ILMN_1724941 | -0,49 | -0,55 | 1,73E-05 |
| 127 | RSPRY1    | ILMN_1763694 | -0,49 | -0,49 | 8,56E-05 |
| 128 | EIF5A2    | ILMN_1735151 | -0,49 | -0,55 | 2,29E-05 |
| 129 | SLC5A6    | ILMN_1741054 | -0,48 | -0,71 | 1,47E-05 |
| 130 | CORO1A    | ILMN_1713749 | -0,48 | -0,61 | 5,63E-06 |
| 131 | TMEM127   | ILMN_1721563 | -0,48 | -0,66 | 2,31E-05 |
| 132 | DCPS      | ILMN_1740737 | -0,48 | -0,83 | 3,66E-05 |
| 133 | ATP6V0B   | ILMN_1721391 | -0,48 | -0,50 | 9,98E-05 |
| 134 | STX3      | ILMN_1659544 | -0,48 | -0,64 | 9,24E-06 |
| 135 | RNF24     | ILMN_1717809 | -0,48 | -0,73 | 2,35E-04 |
| 136 | PLP2      | ILMN_1738767 | -0,48 | -0,57 | 1,51E-05 |
| 137 | NUFIP2    | ILMN_1765829 | -0,47 | -0,52 | 3,65E-04 |
| 138 | CDK6      | ILMN_1802615 | -0,47 | -0,58 | 3,31E-05 |
| 139 | SERTAD3   | ILMN_1813955 | -0,47 | -0,60 | 2,75E-05 |
| 140 | CD163L1   | ILMN_1661905 | -0,47 | -0,56 | 1,77E-05 |

## Additional file 5: Upregulated genes

|     |           |              |       |       |          |
|-----|-----------|--------------|-------|-------|----------|
| 141 | CXCL16    | ILMN_1672278 | -0,47 | -0,71 | 5,46E-06 |
| 142 | DNAJC5    | ILMN_1719709 | -0,47 | -0,57 | 3,37E-04 |
| 143 | CINP      | ILMN_1765257 | -0,47 | -0,59 | 1,06E-05 |
| 144 | SNX11     | ILMN_1696051 | -0,47 | -0,49 | 3,21E-05 |
| 145 | FNBP1L    | ILMN_1754600 | -0,47 | -0,77 | 7,04E-05 |
| 146 | CALR      | ILMN_1736256 | -0,47 | -0,47 | 3,26E-04 |
| 147 | ADIPOR2   | ILMN_1750651 | -0,47 | -0,63 | 4,52E-06 |
| 148 | UGT8      | ILMN_1758816 | -0,46 | -0,53 | 2,14E-05 |
| 149 | TRIM29    | ILMN_1657766 | -0,46 | -0,50 | 5,67E-05 |
| 150 | LOC648245 | ILMN_1791141 | -0,46 | -0,55 | 4,59E-04 |
| 151 | ACSS2     | ILMN_1675125 | -0,46 | -0,77 | 1,35E-06 |
| 152 | PEX5      | ILMN_1660232 | -0,46 | -0,56 | 1,12E-05 |
| 153 | SHB       | ILMN_1732612 | -0,46 | -0,52 | 1,70E-04 |
| 154 | C21ORF25  | ILMN_1652512 | -0,46 | -0,63 | 1,08E-05 |
| 155 | OSTM1     | ILMN_1720303 | -0,46 | -0,65 | 3,77E-05 |
| 156 | PHLDA2    | ILMN_1671557 | -0,45 | -0,60 | 9,49E-05 |
| 157 | HS.534682 | ILMN_1892086 | -0,45 | -0,75 | 4,53E-05 |
| 158 | UHMK1     | ILMN_1702513 | -0,45 | -0,61 | 3,43E-04 |
| 159 | MRPS7     | ILMN_1813389 | -0,45 | -0,57 | 1,13E-04 |
| 160 | PDLIM7    | ILMN_1814985 | -0,45 | -0,58 | 1,20E-04 |
| 161 | AP1S2     | ILMN_1766411 | -0,45 | -0,64 | 6,22E-06 |
| 162 | EIF2B1    | ILMN_1753716 | -0,44 | -0,51 | 8,00E-06 |
| 163 | TRAM2     | ILMN_1788783 | -0,44 | -0,57 | 4,15E-06 |
| 164 | CDA       | ILMN_1714592 | -0,44 | -1,04 | 8,83E-07 |
| 165 | PIM1      | ILMN_1809933 | -0,44 | -0,54 | 1,69E-05 |
| 166 | RTN4R     | ILMN_1737484 | -0,44 | -0,58 | 1,37E-04 |
| 167 | GNB1L     | ILMN_1761044 | -0,44 | -0,47 | 9,02E-05 |
| 168 | OTUD6B    | ILMN_1772703 | -0,43 | -0,49 | 1,21E-05 |
| 169 | PABPN1    | ILMN_1759154 | -0,43 | -0,59 | 3,38E-04 |
| 170 | SCD       | ILMN_1689329 | -0,43 | -0,52 | 1,40E-05 |
| 171 | YOD1      | ILMN_1678919 | -0,43 | -0,51 | 1,43E-04 |
| 172 | GUCA2A    | ILMN_1763749 | -0,43 | -0,46 | 2,00E-05 |
| 173 | PSMD11    | ILMN_1800952 | -0,43 | -0,56 | 7,27E-05 |
| 174 | SDF2L1    | ILMN_1749213 | -0,43 | -0,59 | 2,07E-04 |
| 175 | FHL3      | ILMN_1703558 | -0,43 | -0,47 | 1,79E-05 |
| 176 | HECTD3    | ILMN_1813731 | -0,43 | -0,50 | 5,59E-05 |
| 177 | LOC728825 | ILMN_1667970 | -0,43 | -0,57 | 1,37E-04 |
| 178 | MGC52282  | ILMN_1770765 | -0,43 | -0,77 | 9,91E-06 |
| 179 | SLC16A4   | ILMN_1804673 | -0,43 | -0,59 | 6,48E-06 |
| 180 | GPR115    | ILMN_1684653 | -0,43 | -0,55 | 1,06E-05 |
| 181 | LRRC8A    | ILMN_1739840 | -0,43 | -0,48 | 1,50E-05 |
| 182 | TIMP1     | ILMN_1711566 | -0,43 | -0,60 | 4,13E-06 |
| 183 | RNASE1    | ILMN_1695339 | -0,42 | -0,48 | 1,35E-05 |
| 184 | SNX8      | ILMN_1804051 | -0,42 | -0,57 | 4,16E-05 |
| 185 | LOC653157 | ILMN_1665332 | -0,42 | -0,69 | 3,17E-05 |
| 186 | ATP6V1F   | ILMN_1678308 | -0,42 | -0,56 | 3,06E-04 |
| 187 | MRPL50    | ILMN_1664833 | -0,42 | -0,44 | 2,35E-04 |

## Additional file 5: Upregulated genes

|     |           |              |       |       |          |
|-----|-----------|--------------|-------|-------|----------|
| 188 | AP1M1     | ILMN_1754738 | -0,42 | -0,51 | 4,98E-04 |
| 189 | IL10RB    | ILMN_1767360 | -0,42 | -0,44 | 4,23E-05 |
| 190 | MVP       | ILMN_1803277 | -0,42 | -0,62 | 1,33E-05 |
| 191 | ZNF395    | ILMN_1772876 | -0,42 | -0,45 | 6,47E-05 |
| 192 | LOC390466 | ILMN_1665781 | -0,41 | -0,61 | 3,20E-05 |
| 193 | SCNN1A    | ILMN_1713995 | -0,41 | -0,46 | 2,69E-04 |
| 194 | ZDHHC9    | ILMN_1733284 | -0,41 | -0,78 | 2,62E-07 |
| 195 | LOC652489 | ILMN_1666564 | -0,41 | -0,56 | 6,85E-05 |
| 196 | LOC201175 | ILMN_1656361 | -0,41 | -0,73 | 8,71E-05 |
| 197 | HOXA10    | ILMN_1682110 | -0,41 | -0,50 | 6,40E-05 |
| 198 | LRPAP1    | ILMN_1660341 | -0,41 | -0,60 | 6,05E-05 |
| 199 | PARP16    | ILMN_1812080 | -0,41 | -0,45 | 3,40E-05 |
| 200 | ATP6V0D1  | ILMN_1795826 | -0,40 | -0,51 | 2,29E-05 |
| 201 | MEF2D     | ILMN_1763228 | -0,40 | -0,48 | 1,60E-04 |
| 202 | PHCA      | ILMN_1812552 | -0,40 | -0,55 | 4,34E-04 |
| 203 | ITPKA     | ILMN_1776516 | -0,40 | -0,60 | 1,26E-05 |
| 204 | LOC124220 | ILMN_1742830 | -0,40 | -0,59 | 1,28E-04 |
| 205 | PLAUR     | ILMN_1666507 | -0,40 | -0,71 | 1,69E-06 |
| 206 | WDR55     | ILMN_1678957 | -0,40 | -0,40 | 1,14E-04 |
| 207 | LASP1     | ILMN_1665909 | -0,40 | -0,44 | 4,06E-05 |
| 208 | C19ORF24  | ILMN_1678052 | -0,40 | -0,53 | 1,11E-04 |
| 209 | TMEM8     | ILMN_1741371 | -0,40 | -0,50 | 3,20E-05 |
| 210 | SLC39A14  | ILMN_1764629 | -0,40 | -0,46 | 2,10E-05 |
| 211 | GPRC5A    | ILMN_1682599 | -0,40 | -0,56 | 2,30E-05 |
| 212 | CTSB      | ILMN_1696360 | -0,39 | -0,50 | 1,47E-05 |
| 213 | SRPR      | ILMN_1785660 | -0,39 | -0,46 | 3,31E-05 |
| 214 | CYB561    | ILMN_1679721 | -0,39 | -0,57 | 5,61E-06 |
| 215 | C9ORF89   | ILMN_1659189 | -0,39 | -0,56 | 1,26E-04 |
| 216 | F3        | ILMN_1797009 | -0,39 | -0,63 | 1,91E-06 |
| 217 | TBPL1     | ILMN_1708147 | -0,39 | -0,50 | 3,98E-05 |
| 218 | RAB40B    | ILMN_1685820 | -0,39 | -0,40 | 1,22E-04 |
| 219 | CALM1     | ILMN_1778242 | -0,38 | -0,48 | 7,37E-06 |
| 220 | PCTP      | ILMN_1802257 | -0,38 | -0,51 | 1,48E-05 |
| 221 | ATG9A     | ILMN_1739008 | -0,38 | -0,41 | 2,48E-04 |
| 222 | C14ORF147 | ILMN_1699676 | -0,38 | -0,52 | 8,30E-06 |
| 223 | TMEM184B  | ILMN_1747460 | -0,38 | -0,70 | 2,07E-04 |
| 224 | WDR26     | ILMN_1719343 | -0,38 | -0,41 | 9,02E-05 |
| 225 | LOC728910 | ILMN_1658569 | -0,38 | -0,59 | 2,63E-05 |
| 226 | BCL2L12   | ILMN_1731193 | -0,38 | -0,40 | 1,39E-04 |
| 227 | TRIM16    | ILMN_1680487 | -0,37 | -0,47 | 2,46E-04 |
| 228 | BTBD14A   | ILMN_1809522 | -0,37 | -0,53 | 1,15E-04 |
| 229 | SIDT2     | ILMN_1791912 | -0,37 | -0,48 | 3,17E-05 |
| 230 | NBEAL2    | ILMN_1660629 | -0,37 | -0,45 | 2,69E-04 |
| 231 | PHC2      | ILMN_1808047 | -0,37 | -0,44 | 4,00E-05 |
| 232 | LEMD2     | ILMN_1680860 | -0,37 | -0,39 | 3,45E-04 |
| 233 | UPP1      | ILMN_1798256 | -0,37 | -0,67 | 1,90E-05 |
| 234 | M6PRBP1   | ILMN_1660021 | -0,37 | -0,44 | 3,06E-05 |

## Additional file 5: Upregulated genes

|     |           |              |       |       |          |
|-----|-----------|--------------|-------|-------|----------|
| 235 | LOC728229 | ILMN_1785919 | -0,37 | -0,37 | 2,32E-04 |
| 236 | DERL2     | ILMN_1761969 | -0,37 | -0,38 | 3,50E-04 |
| 237 | GPATCH4   | ILMN_1694837 | -0,37 | -0,41 | 2,63E-04 |
| 238 | SPRR1A    | ILMN_1716591 | -0,36 | -0,54 | 7,23E-05 |
| 239 | PLOD3     | ILMN_1714350 | -0,36 | -0,44 | 6,60E-05 |
| 240 | SSNA1     | ILMN_1715705 | -0,36 | -0,45 | 1,12E-04 |
| 241 | TGFBR2    | ILMN_1726245 | -0,36 | -0,57 | 1,73E-05 |
| 242 | SULT1A3   | ILMN_1815283 | -0,36 | -0,39 | 1,70E-04 |
| 243 | HOXB7     | ILMN_1702125 | -0,36 | -0,41 | 1,02E-04 |
| 244 | DIRC2     | ILMN_1793743 | -0,36 | -0,63 | 2,40E-05 |
| 245 | TRIM15    | ILMN_1711197 | -0,36 | -0,54 | 4,76E-05 |
| 246 | EVI5      | ILMN_1746314 | -0,36 | -0,37 | 3,31E-04 |
| 247 | TICAM1    | ILMN_1815079 | -0,36 | -0,39 | 1,74E-04 |
| 248 | MACROD1   | ILMN_1740960 | -0,36 | -0,41 | 1,40E-04 |
| 249 | CCND3     | ILMN_1668721 | -0,36 | -0,63 | 4,02E-04 |
| 250 | KRT19     | ILMN_1753924 | -0,35 | -0,39 | 6,04E-05 |
| 251 | GPR37     | ILMN_1668271 | -0,35 | -0,46 | 1,77E-04 |
| 252 | SLC2A4RG  | ILMN_1740430 | -0,35 | -0,41 | 5,97E-05 |
| 253 | HS.574530 | ILMN_1896129 | -0,35 | -0,35 | 3,09E-04 |
| 254 | RHBDF1    | ILMN_1808404 | -0,35 | -0,46 | 1,28E-04 |
| 255 | SLC9A6    | ILMN_1677829 | -0,35 | -0,42 | 2,02E-04 |
| 256 | NOS3      | ILMN_1775224 | -0,35 | -0,65 | 1,66E-04 |
| 257 | ARMC7     | ILMN_1797298 | -0,35 | -0,40 | 2,99E-04 |
| 258 | CHMP4A    | ILMN_1702828 | -0,35 | -0,40 | 3,67E-04 |
| 259 | C1ORF210  | ILMN_1670064 | -0,35 | -0,40 | 2,00E-04 |
| 260 | NP        | ILMN_1777534 | -0,35 | -0,52 | 1,05E-04 |
| 261 | ALS2      | ILMN_1750256 | -0,35 | -0,42 | 5,54E-05 |
| 262 | SLC7A6    | ILMN_1812559 | -0,35 | -0,69 | 4,94E-05 |
| 263 | DMAP1     | ILMN_1773885 | -0,35 | -0,42 | 1,49E-04 |
| 264 | DEFB1     | ILMN_1686573 | -0,35 | -0,68 | 9,80E-05 |
| 265 | LOC643357 | ILMN_1760338 | -0,34 | -0,42 | 3,80E-04 |
| 266 | PXN       | ILMN_1684440 | -0,34 | -0,47 | 5,73E-05 |
| 267 | ANKRD13A  | ILMN_1689908 | -0,34 | -0,49 | 3,61E-05 |
| 268 | SMG7      | ILMN_1690469 | -0,34 | -0,48 | 1,77E-04 |
| 269 | SAV1      | ILMN_1789552 | -0,34 | -0,45 | 1,47E-04 |
| 270 | CYB5A     | ILMN_1714167 | -0,34 | -0,58 | 8,50E-05 |
| 271 | ADAM8     | ILMN_1708348 | -0,34 | -0,52 | 1,56E-04 |
| 272 | SLC22A5   | ILMN_1699357 | -0,34 | -0,34 | 2,30E-04 |
| 273 | SYNJ2     | ILMN_1751749 | -0,34 | -0,40 | 3,44E-04 |
| 274 | KUA-UEV   | ILMN_1677446 | -0,34 | -0,42 | 2,63E-04 |
| 275 | EHD1      | ILMN_1651832 | -0,33 | -0,35 | 3,22E-04 |
| 276 | RHPN2     | ILMN_1753143 | -0,33 | -0,40 | 7,61E-05 |
| 277 | BCL9L     | ILMN_1743966 | -0,33 | -0,58 | 3,43E-04 |
| 278 | DYNLL2    | ILMN_1772796 | -0,33 | -0,35 | 2,63E-04 |
| 279 | PVR       | ILMN_1677305 | -0,33 | -0,35 | 6,51E-04 |
| 280 | NEDD4     | ILMN_1807881 | -0,33 | -0,35 | 3,59E-04 |
| 281 | PTPRE     | ILMN_1660907 | -0,33 | -0,36 | 1,47E-04 |

## Additional file 5: Upregulated genes

|     |           |              |       |       |          |
|-----|-----------|--------------|-------|-------|----------|
| 282 | GPATCH3   | ILMN_1686929 | -0,33 | -0,37 | 4,10E-04 |
| 283 | FLJ20186  | ILMN_1767509 | -0,33 | -0,37 | 1,11E-04 |
| 284 | KRT80     | ILMN_1705814 | -0,33 | -0,50 | 4,83E-05 |
| 285 | KCTD10    | ILMN_1719064 | -0,33 | -0,38 | 1,79E-04 |
| 286 | TTC26     | ILMN_1676555 | -0,33 | -0,36 | 2,39E-04 |
| 287 | APOBEC1   | ILMN_1813881 | -0,33 | -0,42 | 1,51E-04 |
| 288 | HS.558072 | ILMN_1861057 | -0,33 | -0,43 | 6,36E-05 |
| 289 | PCSK6     | ILMN_1676595 | -0,33 | -0,36 | 5,34E-05 |
| 290 | MARK2     | ILMN_1789692 | -0,33 | -0,35 | 2,26E-04 |
| 291 | SULT2B1   | ILMN_1763520 | -0,33 | -0,78 | 4,32E-06 |
| 292 | TM4SF1    | ILMN_1770338 | -0,33 | -0,36 | 2,32E-04 |
| 293 | MYLIP     | ILMN_1656111 | -0,33 | -0,61 | 1,22E-04 |
| 294 | HS.348844 | ILMN_1915188 | -0,33 | -0,41 | 1,44E-04 |
| 295 | HS.200085 | ILMN_1820327 | -0,32 | -0,33 | 3,65E-04 |
| 296 | CSNK1D    | ILMN_1720708 | -0,32 | -0,43 | 3,35E-05 |
| 297 | SC4MOL    | ILMN_1720889 | -0,32 | -0,51 | 1,94E-04 |
| 298 | IRF3      | ILMN_1765649 | -0,32 | -0,40 | 2,00E-04 |
| 299 | RAB5B     | ILMN_1752582 | -0,32 | -0,43 | 8,83E-05 |
| 300 | C13ORF15  | ILMN_1658494 | -0,32 | -0,49 | 1,62E-04 |
| 301 | MFSD5     | ILMN_1702065 | -0,32 | -0,43 | 1,36E-04 |
| 302 | C1ORF21   | ILMN_1797735 | -0,32 | -0,45 | 3,93E-04 |
| 303 | NTSR1     | ILMN_1778831 | -0,32 | -0,54 | 1,25E-04 |
| 304 | EFNA1     | ILMN_1775903 | -0,32 | -0,45 | 4,86E-05 |
| 305 | UBE2Q1    | ILMN_1811751 | -0,32 | -0,36 | 4,39E-04 |
| 306 | MAP1A     | ILMN_1772366 | -0,32 | -0,37 | 5,22E-04 |
| 307 | STAM      | ILMN_1765409 | -0,32 | -0,38 | 2,03E-04 |
| 308 | MGC57346  | ILMN_1784428 | -0,32 | -0,73 | 8,81E-05 |
| 309 | RNF11     | ILMN_1810785 | -0,32 | -0,39 | 3,32E-05 |
| 310 | CTNS      | ILMN_1807719 | -0,31 | -0,41 | 2,17E-04 |
| 311 | UBTD1     | ILMN_1794914 | -0,31 | -0,45 | 2,32E-04 |
| 312 | PHLDA3    | ILMN_1659106 | -0,31 | -0,64 | 7,70E-05 |
| 313 | HMGCS1    | ILMN_1797728 | -0,31 | -0,45 | 2,08E-04 |
| 314 | ZFAND2A   | ILMN_1694671 | -0,31 | -0,55 | 1,55E-04 |
| 315 | LAT       | ILMN_1658322 | -0,31 | -0,34 | 2,01E-04 |
| 316 | SLC36A1   | ILMN_1787826 | -0,31 | -0,78 | 4,51E-05 |
| 317 | MLLT11    | ILMN_1759097 | -0,31 | -0,58 | 1,29E-04 |
| 318 | CLTB      | ILMN_1709346 | -0,31 | -0,42 | 9,04E-05 |
| 319 | SLC24A6   | ILMN_1701655 | -0,30 | -0,57 | 1,53E-04 |
| 320 | CDKN1A    | ILMN_1787212 | -0,30 | -0,97 | 1,07E-06 |
| 321 | TMED9     | ILMN_1743655 | -0,30 | -0,38 | 1,36E-04 |
| 322 | SPRR3     | ILMN_1810835 | -0,30 | -0,54 | 3,66E-05 |
| 323 | C11ORF59  | ILMN_1815878 | -0,30 | -0,34 | 4,31E-04 |
| 324 | MAG1      | ILMN_1794875 | -0,30 | -0,87 | 6,71E-06 |
| 325 | BTBD7     | ILMN_1757298 | -0,30 | -0,32 | 2,30E-04 |
| 326 | RPL41     | ILMN_1710001 | -0,30 | -0,41 | 2,03E-04 |
| 327 | MOSPD1    | ILMN_1765276 | -0,29 | -0,44 | 2,67E-05 |
| 328 | MCOLN1    | ILMN_1764383 | -0,29 | -0,39 | 5,00E-04 |

## Additional file 5: Upregulated genes

|     |           |              |       |       |          |
|-----|-----------|--------------|-------|-------|----------|
| 329 | RPA2      | ILMN_1698510 | -0,29 | -0,37 | 4,50E-04 |
| 330 | ELOVL6    | ILMN_1700546 | -0,29 | -0,45 | 1,68E-04 |
| 331 | DUSP5     | ILMN_1656501 | -0,29 | -0,84 | 6,17E-06 |
| 332 | HERC5     | ILMN_1729749 | -0,29 | -0,50 | 1,10E-04 |
| 333 | ARMET     | ILMN_1682514 | -0,29 | -0,42 | 1,78E-04 |
| 334 | FKSG30    | ILMN_1814998 | -0,29 | -0,39 | 3,67E-04 |
| 335 | CYP24A1   | ILMN_1685663 | -0,29 | -0,36 | 5,05E-04 |
| 336 | CYP39A1   | ILMN_1680417 | -0,28 | -0,30 | 3,66E-04 |
| 337 | MOBK2C    | ILMN_1719677 | -0,28 | -0,35 | 4,34E-04 |
| 338 | CRIM1     | ILMN_1809793 | -0,28 | -0,32 | 2,84E-04 |
| 339 | SLC16A3   | ILMN_1808982 | -0,28 | -0,58 | 2,36E-04 |
| 340 | CMTM7     | ILMN_1698934 | -0,28 | -0,71 | 4,71E-05 |
| 341 | CLDN4     | ILMN_1751764 | -0,28 | -0,30 | 6,35E-04 |
| 342 | S100A4    | ILMN_1688780 | -0,28 | -0,50 | 2,10E-04 |
| 343 | SSFA2     | ILMN_1742260 | -0,28 | -0,44 | 3,88E-04 |
| 344 | FLVCR1    | ILMN_1661596 | -0,28 | -0,35 | 4,76E-04 |
| 345 | HS.538259 | ILMN_1838313 | -0,28 | -0,49 | 3,51E-04 |
| 346 | NNMT      | ILMN_1715508 | -0,28 | -0,43 | 2,56E-04 |
| 347 | CDC25A    | ILMN_1733396 | -0,27 | -0,46 | 1,55E-04 |
| 348 | D15WSU75E | ILMN_1737580 | -0,27 | -0,40 | 3,57E-04 |
| 349 | ADM       | ILMN_1708934 | -0,27 | -0,46 | 2,48E-04 |
| 350 | LOC728760 | ILMN_1658563 | -0,27 | -0,35 | 2,84E-04 |
| 351 | CLN5      | ILMN_1778203 | -0,27 | -0,44 | 5,12E-04 |
| 352 | SSX2IP    | ILMN_1720844 | -0,27 | -0,61 | 2,57E-04 |
| 353 | LRRC51    | ILMN_1685836 | -0,27 | -0,46 | 1,16E-04 |
| 354 | KRT81     | ILMN_1801442 | -0,26 | -0,52 | 3,14E-04 |
| 355 | TMEM79    | ILMN_1656312 | -0,26 | -0,54 | 3,29E-04 |
| 356 | DAB2      | ILMN_1764228 | -0,26 | -0,62 | 8,42E-05 |
| 357 | KISS1     | ILMN_1669404 | -0,26 | -0,82 | 3,85E-04 |
| 358 | MVK       | ILMN_1786310 | -0,25 | -0,29 | 6,66E-04 |
| 359 | AXUD1     | ILMN_1703123 | -0,25 | -0,60 | 3,78E-04 |
| 360 | FANCG     | ILMN_1744900 | -0,25 | -0,38 | 6,92E-04 |
| 361 | C11ORF24  | ILMN_1808163 | -0,25 | -0,34 | 2,94E-04 |
| 362 | HS.573047 | ILMN_1850816 | -0,25 | -0,43 | 2,57E-04 |
| 363 | C20ORF24  | ILMN_1679195 | -0,25 | -0,29 | 7,23E-04 |
| 364 | TSC22D4   | ILMN_1706609 | -0,24 | -0,38 | 4,23E-04 |
| 365 | ATF5      | ILMN_1669113 | -0,24 | -0,36 | 4,45E-04 |
| 366 | CLIC3     | ILMN_1796423 | -0,24 | -0,38 | 2,06E-04 |
| 367 | LOC653888 | ILMN_1804530 | -0,24 | -0,42 | 4,44E-04 |
| 368 | MICA      | ILMN_1655675 | -0,24 | -0,44 | 4,70E-04 |
| 369 | TEAD2     | ILMN_1682781 | -0,23 | -0,62 | 2,12E-04 |
| 370 | RBM35A    | ILMN_1749180 | -0,23 | -0,37 | 4,48E-04 |
| 371 | CDC34     | ILMN_1713006 | -0,23 | -0,60 | 2,96E-04 |
| 372 | ARRB1     | ILMN_1735218 | -0,23 | -0,28 | 5,01E-04 |
| 373 | NFKBIA    | ILMN_1773154 | -0,23 | -0,62 | 7,33E-05 |
| 374 | TNFRSF10D | ILMN_1666022 | -0,23 | -0,36 | 3,09E-04 |
| 375 | B3GALTL   | ILMN_1764813 | -0,23 | -0,42 | 4,78E-04 |



## Additional file 5: Upregulated genes

|     |           |              |       |       |          |
|-----|-----------|--------------|-------|-------|----------|
| 376 | CLIP4     | ILMN_1759792 | -0,23 | -0,67 | 5,53E-05 |
| 377 | TRIM8     | ILMN_1746704 | -0,23 | -0,40 | 1,19E-04 |
| 378 | CSTB      | ILMN_1761797 | -0,23 | -0,32 | 4,27E-04 |
| 379 | PNPLA7    | ILMN_1662587 | -0,22 | -0,59 | 4,88E-05 |
| 380 | PLA2G10   | ILMN_1762561 | -0,22 | -0,41 | 4,15E-04 |
| 381 | PDCD10    | ILMN_1709396 | -0,22 | -0,38 | 2,91E-04 |
| 382 | CST6      | ILMN_1697733 | -0,21 | -0,47 | 1,15E-04 |
| 383 | FAM89A    | ILMN_1652677 | -0,21 | -0,58 | 3,34E-04 |
| 384 | DDR1      | ILMN_1812262 | -0,21 | -0,67 | 2,20E-04 |
| 385 | ITPR1     | ILMN_1789505 | -0,21 | -0,45 | 1,38E-04 |
| 386 | ST14      | ILMN_1681245 | -0,21 | -0,44 | 4,67E-04 |
| 387 | C14ORF151 | ILMN_1729596 | -0,21 | -0,95 | 6,82E-05 |
| 388 | ITGA3     | ILMN_1685397 | -0,20 | -0,97 | 2,84E-05 |
| 389 | NY-SAR-48 | ILMN_1768020 | -0,20 | -0,52 | 3,70E-04 |
| 390 | GPR114    | ILMN_1666902 | -0,20 | -0,48 | 2,18E-04 |
| 391 | ABHD12    | ILMN_1745116 | -0,20 | -0,64 | 1,38E-04 |
| 392 | ITGA2     | ILMN_1665792 | -0,19 | -0,63 | 3,84E-04 |
| 393 | HS.572030 | ILMN_1879326 | -0,18 | -0,56 | 4,01E-04 |
| 394 | GLRX      | ILMN_1737308 | -0,17 | -0,65 | 1,15E-04 |
| 395 | OAS1      | ILMN_1658247 | -0,17 | -0,85 | 3,87E-04 |
| 396 | CLDN9     | ILMN_1740276 | -0,17 | -0,58 | 4,68E-04 |
| 397 | CALU      | ILMN_1727194 | -0,17 | -0,73 | 3,95E-05 |
| 398 | SRPX2     | ILMN_1676213 | -0,17 | -0,86 | 4,82E-05 |
| 399 | ATP6V1A   | ILMN_1711516 | -0,16 | -0,49 | 4,54E-04 |
| 400 | GJB3      | ILMN_1652390 | -0,15 | -0,77 | 4,00E-04 |
| 401 | C12ORF36  | ILMN_1694293 | -0,13 | -0,90 | 2,90E-05 |
| 402 | GPX3      | ILMN_1726666 | -0,13 | -0,74 | 9,58E-05 |
| 403 | SPRR1A    | ILMN_1711174 | -0,13 | -0,94 | 9,91E-06 |
| 404 | CSF2      | ILMN_1661861 | -0,12 | -0,71 | 1,15E-04 |
| 405 | SDCBP2    | ILMN_1749535 | -0,10 | -1,32 | 2,31E-06 |
| 406 | DHRS9     | ILMN_1727150 | 0,12  | -1,79 | 4,10E-06 |

<sup>1</sup>Score=(FC<sub>AC</sub>+FC<sub>BC</sub>)/2 - Stddev(FC<sub>AC</sub>,FC<sub>BC</sub>)

<sup>2</sup>LogFCmean=(FC<sub>AC</sub>+FC<sub>BC</sub>)/2

FC=Fold Change, Stddev = Standard deviation
