# Supplementary material for: Expression profiling and intracellular localization studies of the novel Proline-, Histidine-, and Glycine-rich protein 1 suggest an essential role in gastro-intestinal epithelium and a potential clinical application in colorectal cancer diagnostics
Source: Springer Nature journal article supplement (doi:10.1186/s12876-018-0752-8), 2018-02-07
Supplement: MOESM6 [file 15445836]

## Additional file 6: Downregulated genes

| No | ILMN_Gene | Probe_ID     | Score <sup>1</sup> | logFCmean <sup>2</sup> | adjPmean |
|----|-----------|--------------|--------------------|------------------------|----------|
| 1  | RASD1     | ILMN_1740426 | 1,83               | 2,08                   | 3,07E-10 |
| 2  | SOSTDC1   | ILMN_1715463 | 1,22               | 1,63                   | 1,51E-09 |
| 3  | DDIT4     | ILMN_1661599 | 1,19               | 1,41                   | 9,66E-10 |
| 4  | LOC644844 | ILMN_1661078 | 1,15               | 1,20                   | 2,63E-08 |
| 5  | ULBP1     | ILMN_1738407 | 1,13               | 1,16                   | 6,17E-08 |
| 6  | ASS1      | ILMN_1688234 | 1,12               | 1,29                   | 1,32E-09 |
| 7  | CLEC3A    | ILMN_1761066 | 0,99               | 1,76                   | 2,12E-09 |
| 8  | SLC4A4    | ILMN_1734897 | 0,99               | 1,15                   | 3,37E-07 |
| 9  | ALDH1L1   | ILMN_1802167 | 0,91               | 1,04                   | 1,86E-08 |
| 10 | CTH       | ILMN_1784112 | 0,91               | 0,97                   | 1,82E-07 |
| 11 | HS.389988 | ILMN_1874575 | 0,90               | 1,03                   | 3,56E-06 |
| 12 | CHAC1     | ILMN_1739241 | 0,88               | 0,88                   | 6,97E-08 |
| 13 | DEPDC6    | ILMN_1756685 | 0,86               | 0,99                   | 2,23E-07 |
| 14 | F2R       | ILMN_1742866 | 0,86               | 1,17                   | 9,43E-08 |
| 15 | ASNS      | ILMN_1796417 | 0,85               | 0,91                   | 9,40E-06 |
| 16 | PTBP2     | ILMN_1707240 | 0,85               | 1,31                   | 1,40E-06 |
| 17 | MAOA      | ILMN_1663640 | 0,84               | 0,91                   | 3,01E-06 |
| 18 | PRSS1     | ILMN_1734773 | 0,84               | 1,00                   | 8,23E-08 |
| 19 | PSPH      | ILMN_1776105 | 0,81               | 0,91                   | 1,02E-07 |
| 20 | RGS2      | ILMN_1710974 | 0,80               | 1,20                   | 1,71E-06 |
| 21 | PROM1     | ILMN_1786720 | 0,77               | 1,01                   | 5,77E-08 |
| 22 | PCK2      | ILMN_1760649 | 0,75               | 0,91                   | 2,90E-08 |
| 23 | HS.355933 | ILMN_1915076 | 0,74               | 0,84                   | 2,18E-07 |
| 24 | MXD4      | ILMN_1756541 | 0,72               | 0,72                   | 1,27E-05 |
| 25 | SCML1     | ILMN_1776653 | 0,72               | 0,83                   | 2,31E-05 |
| 26 | CFTR      | ILMN_1705813 | 0,71               | 1,14                   | 1,07E-06 |
| 27 | CAP2      | ILMN_1691237 | 0,71               | 1,05                   | 5,31E-07 |
| 28 | RFX5      | ILMN_1741200 | 0,70               | 0,87                   | 7,78E-06 |
| 29 | IVD       | ILMN_1724207 | 0,69               | 0,72                   | 1,27E-05 |
| 30 | NFIX      | ILMN_1694325 | 0,69               | 0,82                   | 4,85E-05 |
| 31 | GPC2      | ILMN_1651642 | 0,68               | 0,91                   | 3,80E-08 |
| 32 | CCDC98    | ILMN_1754344 | 0,68               | 0,87                   | 1,91E-05 |
| 33 | CEBPG     | ILMN_1716766 | 0,68               | 0,68                   | 5,69E-07 |
| 34 | HOXB9     | ILMN_1716708 | 0,67               | 0,76                   | 5,95E-06 |
| 35 | FLJ39822  | ILMN_1709635 | 0,67               | 0,88                   | 1,40E-06 |
| 36 | HIST2H2BE | ILMN_1732071 | 0,67               | 1,33                   | 5,03E-07 |
| 37 | NUPR1     | ILMN_1790234 | 0,66               | 0,71                   | 1,47E-06 |
| 38 | PTGS2     | ILMN_1677511 | 0,66               | 1,12                   | 1,59E-06 |
| 39 | HIST1H2AG | ILMN_1686478 | 0,65               | 0,75                   | 7,33E-07 |
| 40 | TSGA14    | ILMN_1797209 | 0,65               | 0,67                   | 2,51E-05 |
| 41 | IGSF10    | ILMN_1673141 | 0,64               | 0,69                   | 5,07E-07 |
| 42 | ITPR2     | ILMN_1736103 | 0,63               | 0,74                   | 5,06E-06 |
| 43 | TUBE1     | ILMN_1764398 | 0,63               | 0,71                   | 1,45E-05 |
| 44 | ADM2      | ILMN_1702933 | 0,63               | 0,83                   | 8,18E-07 |
| 45 | NMU       | ILMN_1740250 | 0,63               | 0,66                   | 1,29E-05 |
| 46 | FZD4      | ILMN_1743367 | 0,63               | 0,65                   | 2,18E-06 |

## Additional file 6: Downregulated genes

|    |           |              |      |      |          |
|----|-----------|--------------|------|------|----------|
| 47 | ALDH6A1   | ILMN_1785284 | 0,62 | 0,87 | 3,08E-05 |
| 48 | FILIP1L   | ILMN_1738578 | 0,61 | 0,74 | 8,29E-07 |
| 49 | BBS2      | ILMN_1767612 | 0,61 | 0,68 | 2,10E-05 |
| 50 | KIAA1199  | ILMN_1813704 | 0,61 | 0,77 | 3,09E-06 |
| 51 | CD99L2    | ILMN_1700681 | 0,60 | 0,70 | 2,45E-06 |
| 52 | EVI5L     | ILMN_1747281 | 0,60 | 0,78 | 4,47E-07 |
| 53 | KIAA0831  | ILMN_1678808 | 0,60 | 0,68 | 1,70E-05 |
| 54 | LOC727820 | ILMN_1776327 | 0,59 | 0,65 | 4,51E-06 |
| 55 | KIAA1468  | ILMN_1798346 | 0,59 | 0,65 | 4,62E-05 |
| 56 | ADH1C     | ILMN_1740717 | 0,58 | 0,60 | 3,01E-06 |
| 57 | HS.19339  | ILMN_1856480 | 0,58 | 0,62 | 3,14E-06 |
| 58 | ITGB6     | ILMN_1662635 | 0,57 | 0,93 | 7,96E-05 |
| 59 | MMP7      | ILMN_1685403 | 0,57 | 0,92 | 5,80E-07 |
| 60 | CEBPD     | ILMN_1782050 | 0,57 | 0,60 | 2,41E-06 |
| 61 | TSC22D3   | ILMN_1748124 | 0,56 | 0,64 | 2,26E-05 |
| 62 | CXCR4     | ILMN_1683307 | 0,56 | 0,81 | 7,51E-06 |
| 63 | DR1       | ILMN_1759983 | 0,56 | 0,67 | 2,15E-06 |
| 64 | EDN1      | ILMN_1682775 | 0,56 | 0,60 | 6,67E-06 |
| 65 | ADAMTS6   | ILMN_1767362 | 0,55 | 1,01 | 5,72E-06 |
| 66 | HIBADH    | ILMN_1804150 | 0,55 | 0,57 | 1,28E-05 |
| 67 | SPRYD3    | ILMN_1735250 | 0,55 | 0,82 | 4,40E-05 |
| 68 | C20ORF108 | ILMN_1708016 | 0,55 | 0,69 | 1,00E-04 |
| 69 | CARS      | ILMN_1696066 | 0,55 | 0,69 | 7,33E-05 |
| 70 | LOC641953 | ILMN_1697232 | 0,55 | 0,83 | 3,21E-05 |
| 71 | HOXC6     | ILMN_1787334 | 0,55 | 0,61 | 1,64E-05 |
| 72 | C14ORF135 | ILMN_1680781 | 0,54 | 0,55 | 7,85E-06 |
| 73 | KAZALD1   | ILMN_1684755 | 0,54 | 0,67 | 1,85E-06 |
| 74 | PPAPDC2   | ILMN_1802628 | 0,54 | 0,60 | 5,15E-05 |
| 75 | GARS      | ILMN_1771026 | 0,53 | 0,56 | 1,69E-05 |
| 76 | THNSL1    | ILMN_1782688 | 0,53 | 0,65 | 1,40E-05 |
| 77 | SLC25A13  | ILMN_1668012 | 0,53 | 0,57 | 6,01E-05 |
| 78 | SH3BGRL   | ILMN_1702835 | 0,53 | 0,67 | 2,62E-06 |
| 79 | CLUAP1    | ILMN_1750596 | 0,53 | 0,58 | 2,37E-06 |
| 80 | SCIN      | ILMN_1813561 | 0,53 | 0,87 | 2,15E-06 |
| 81 | WDR91     | ILMN_1652223 | 0,53 | 0,54 | 8,37E-05 |
| 82 | TEK       | ILMN_1751576 | 0,52 | 0,57 | 8,01E-06 |
| 83 | GNA14     | ILMN_1734857 | 0,52 | 0,70 | 7,85E-07 |
| 84 | MCCC1     | ILMN_1760174 | 0,52 | 0,53 | 2,07E-05 |
| 85 | AKAP7     | ILMN_1679943 | 0,51 | 0,81 | 1,14E-06 |
| 86 | PCCA      | ILMN_1714384 | 0,51 | 0,54 | 9,27E-05 |
| 87 | HS.526540 | ILMN_1874735 | 0,50 | 0,51 | 9,20E-05 |
| 88 | PAM       | ILMN_1788631 | 0,50 | 0,63 | 2,74E-06 |
| 89 | LOC643888 | ILMN_1665060 | 0,50 | 0,51 | 2,12E-05 |
| 90 | APOLD1    | ILMN_1723522 | 0,50 | 0,70 | 9,71E-07 |
| 91 | TMEM117   | ILMN_1809894 | 0,50 | 0,57 | 2,83E-05 |
| 92 | SNX10     | ILMN_1786257 | 0,50 | 0,56 | 9,29E-06 |
| 93 | HS.550806 | ILMN_1869189 | 0,50 | 0,63 | 4,60E-04 |

## Additional file 6: Downregulated genes

|     |           |              |      |      |          |
|-----|-----------|--------------|------|------|----------|
| 94  | CBX7      | ILMN_1657361 | 0,50 | 0,58 | 4,95E-06 |
| 95  | MGC24039  | ILMN_1791593 | 0,50 | 0,59 | 2,28E-05 |
| 96  | WDR45L    | ILMN_1719140 | 0,50 | 0,50 | 1,54E-04 |
| 97  | C11ORF71  | ILMN_1746091 | 0,50 | 0,58 | 6,07E-06 |
| 98  | FLJ12355  | ILMN_1697115 | 0,50 | 0,50 | 2,09E-05 |
| 99  | GNAI1     | ILMN_1742044 | 0,49 | 0,82 | 5,33E-06 |
| 100 | C5ORF13   | ILMN_1680738 | 0,49 | 0,52 | 5,87E-05 |
| 101 | PCCB      | ILMN_1761010 | 0,49 | 0,54 | 5,71E-06 |
| 102 | PSAT1     | ILMN_1692938 | 0,49 | 0,55 | 7,86E-06 |
| 103 | DLD       | ILMN_1664577 | 0,49 | 0,62 | 4,54E-05 |
| 104 | ANKMY2    | ILMN_1784292 | 0,48 | 0,64 | 9,50E-05 |
| 105 | NDRG3     | ILMN_1738229 | 0,48 | 0,57 | 2,14E-04 |
| 106 | MTHFD1L   | ILMN_1772521 | 0,48 | 0,53 | 1,06E-05 |
| 107 | RHOQ      | ILMN_1810559 | 0,48 | 0,56 | 2,28E-05 |
| 108 | CCDC71    | ILMN_1768433 | 0,48 | 0,48 | 4,76E-05 |
| 109 | FLJ40142  | ILMN_1753265 | 0,48 | 0,75 | 1,61E-06 |
| 110 | ZCCHC7    | ILMN_1744980 | 0,48 | 0,48 | 1,03E-05 |
| 111 | C9ORF91   | ILMN_1705313 | 0,47 | 0,48 | 2,85E-05 |
| 112 | SLC37A3   | ILMN_1671704 | 0,47 | 0,61 | 1,07E-05 |
| 113 | KLF15     | ILMN_1683133 | 0,47 | 0,55 | 9,74E-06 |
| 114 | LOC153364 | ILMN_1769449 | 0,47 | 0,47 | 4,90E-05 |
| 115 | LOC652458 | ILMN_1718353 | 0,47 | 0,54 | 2,19E-04 |
| 116 | AARS      | ILMN_1662364 | 0,47 | 0,53 | 4,03E-05 |
| 117 | COPG2     | ILMN_1722065 | 0,47 | 0,63 | 1,21E-05 |
| 118 | GBAS      | ILMN_1778611 | 0,47 | 0,59 | 6,70E-05 |
| 119 | C14ORF159 | ILMN_1721106 | 0,47 | 0,47 | 5,24E-05 |
| 120 | PIR       | ILMN_1761247 | 0,46 | 0,55 | 4,87E-05 |
| 121 | ONECUT2   | ILMN_1664462 | 0,46 | 0,57 | 4,97E-05 |
| 122 | XYLB      | ILMN_1794349 | 0,46 | 0,56 | 3,43E-04 |
| 123 | SP4       | ILMN_1721081 | 0,46 | 0,48 | 1,77E-04 |
| 124 | STK38L    | ILMN_1755792 | 0,45 | 0,56 | 3,53E-05 |
| 125 | ZNF32     | ILMN_1673112 | 0,45 | 0,51 | 9,01E-06 |
| 126 | BCL6      | ILMN_1737314 | 0,45 | 0,46 | 5,52E-05 |
| 127 | INHBE     | ILMN_1811767 | 0,45 | 0,52 | 8,62E-06 |
| 128 | TGIF2     | ILMN_1709044 | 0,45 | 0,52 | 1,01E-05 |
| 129 | VASH2     | ILMN_1692698 | 0,45 | 0,62 | 8,68E-06 |
| 130 | HS.505676 | ILMN_1821280 | 0,45 | 0,60 | 6,77E-06 |
| 131 | DIXDC1    | ILMN_1736704 | 0,45 | 0,53 | 4,85E-06 |
| 132 | MLF1      | ILMN_1684439 | 0,44 | 0,45 | 4,76E-04 |
| 133 | POLR3GL   | ILMN_1760667 | 0,44 | 0,53 | 3,50E-05 |
| 134 | LOC400657 | ILMN_1725528 | 0,44 | 0,52 | 4,83E-05 |
| 135 | MSH3      | ILMN_1719471 | 0,44 | 0,45 | 4,24E-04 |
| 136 | VASN      | ILMN_1667295 | 0,44 | 0,61 | 5,17E-06 |
| 137 | LOC644311 | ILMN_1652259 | 0,44 | 0,46 | 3,55E-05 |
| 138 | MT1G      | ILMN_1715401 | 0,44 | 0,48 | 3,86E-04 |
| 139 | ATG10     | ILMN_1748968 | 0,44 | 0,58 | 1,33E-05 |
| 140 | RHBDL2    | ILMN_1685330 | 0,44 | 0,46 | 2,27E-04 |

## Additional file 6: Downregulated genes

|     |              |              |      |      |          |
|-----|--------------|--------------|------|------|----------|
| 141 | RWDD2A       | ILMN_1722156 | 0,44 | 0,57 | 5,12E-05 |
| 142 | PIGW         | ILMN_1743397 | 0,43 | 0,48 | 4,86E-04 |
| 143 | EVI1         | ILMN_1803367 | 0,43 | 0,44 | 4,28E-05 |
| 144 | LOC644869    | ILMN_1665571 | 0,43 | 0,48 | 8,00E-05 |
| 145 | TCEAL3       | ILMN_1749478 | 0,43 | 0,51 | 1,63E-05 |
| 146 | LMO4         | ILMN_1703487 | 0,43 | 0,58 | 2,26E-06 |
| 147 | HTATSF1      | ILMN_1683221 | 0,43 | 0,51 | 5,76E-06 |
| 148 | USP13        | ILMN_1708059 | 0,43 | 0,45 | 1,53E-04 |
| 149 | ADRB2        | ILMN_1695590 | 0,43 | 0,47 | 1,54E-05 |
| 150 | PQLC3        | ILMN_1814213 | 0,43 | 0,49 | 2,21E-04 |
| 151 | PHGDH        | ILMN_1704537 | 0,43 | 0,75 | 3,69E-06 |
| 152 | INTS3        | ILMN_1756086 | 0,42 | 0,48 | 1,08E-04 |
| 153 | FAM113A      | ILMN_1676302 | 0,42 | 0,47 | 2,46E-05 |
| 154 | ATF3         | ILMN_1661109 | 0,42 | 0,53 | 1,89E-04 |
| 155 | HS.7572      | ILMN_1863185 | 0,42 | 0,53 | 3,61E-05 |
| 156 | HS.107801    | ILMN_1863009 | 0,42 | 0,53 | 1,96E-05 |
| 157 | C6ORF48      | ILMN_1766446 | 0,42 | 0,53 | 2,13E-05 |
| 158 | CORO1C       | ILMN_1745954 | 0,42 | 0,50 | 2,15E-04 |
| 159 | C6ORF117     | ILMN_1794829 | 0,42 | 0,81 | 3,42E-06 |
| 160 | VIPR1        | ILMN_1707959 | 0,41 | 0,49 | 2,93E-05 |
| 161 | IMMP2L       | ILMN_1809292 | 0,41 | 0,41 | 1,42E-04 |
| 162 | ACOT4        | ILMN_1764321 | 0,41 | 0,47 | 3,57E-05 |
| 163 | CEP110       | ILMN_1758778 | 0,41 | 0,52 | 4,33E-05 |
| 164 | DNAJA4       | ILMN_1776998 | 0,41 | 0,53 | 3,94E-05 |
| 165 | ANKRD50      | ILMN_1729342 | 0,41 | 0,52 | 1,21E-04 |
| 166 | YARS         | ILMN_1766010 | 0,41 | 0,47 | 6,64E-05 |
| 167 | FLJ22662     | ILMN_1736605 | 0,41 | 0,59 | 1,14E-05 |
| 168 | PTPN13       | ILMN_1652805 | 0,41 | 0,48 | 1,66E-04 |
| 169 | CIT          | ILMN_1680649 | 0,41 | 0,43 | 1,08E-04 |
| 170 | ZNF643       | ILMN_1799086 | 0,41 | 0,48 | 4,27E-04 |
| 171 | DYNC111      | ILMN_1690397 | 0,41 | 0,56 | 8,45E-05 |
| 172 | TBC1D9       | ILMN_1703891 | 0,41 | 0,76 | 2,58E-06 |
| 173 | TIGD2        | ILMN_1690066 | 0,40 | 0,44 | 4,14E-04 |
| 174 | USP52        | ILMN_1658373 | 0,40 | 0,58 | 4,88E-05 |
| 175 | P2RY5        | ILMN_1786429 | 0,40 | 0,49 | 7,03E-06 |
| 176 | GTF2E1       | ILMN_1655921 | 0,40 | 0,44 | 8,76E-05 |
| 177 | PHF20L1      | ILMN_1727287 | 0,40 | 0,68 | 2,48E-05 |
| 178 | TNFSF10      | ILMN_1801307 | 0,40 | 0,55 | 1,59E-05 |
| 179 | KIAA0652     | ILMN_1692306 | 0,40 | 0,41 | 3,71E-04 |
| 180 | HS.405877    | ILMN_1875354 | 0,39 | 0,43 | 1,28E-04 |
| 181 | NHS          | ILMN_1715864 | 0,39 | 0,51 | 1,72E-05 |
| 182 | SCARNA9      | ILMN_1805064 | 0,39 | 0,65 | 1,01E-05 |
| 183 | DLG7         | ILMN_1749829 | 0,39 | 0,46 | 1,79E-04 |
| 184 | DKFZP564J102 | ILMN_1786278 | 0,39 | 0,46 | 1,01E-04 |
| 185 | ZFAND6       | ILMN_1778803 | 0,39 | 0,41 | 3,35E-04 |
| 186 | C20ORF127    | ILMN_1730049 | 0,39 | 0,42 | 3,53E-05 |
| 187 | STMN1        | ILMN_1657796 | 0,39 | 0,55 | 1,85E-04 |

## Additional file 6: Downregulated genes

|     |           |              |      |      |          |
|-----|-----------|--------------|------|------|----------|
| 188 | DOCK1     | ILMN_1715789 | 0,39 | 0,44 | 3,09E-04 |
| 189 | FBXL17    | ILMN_1715901 | 0,39 | 0,44 | 3,31E-05 |
| 190 | ETV5      | ILMN_1669756 | 0,39 | 0,48 | 1,01E-05 |
| 191 | DDC       | ILMN_1811601 | 0,39 | 0,50 | 2,16E-04 |
| 192 | MOSC2     | ILMN_1665775 | 0,39 | 0,58 | 1,64E-04 |
| 193 | C9ORF97   | ILMN_1684520 | 0,39 | 0,47 | 5,19E-05 |
| 194 | ALDH7A1   | ILMN_1763461 | 0,38 | 0,47 | 6,31E-06 |
| 195 | KBTBD7    | ILMN_1731188 | 0,38 | 0,49 | 8,70E-05 |
| 196 | XPC       | ILMN_1790807 | 0,38 | 0,48 | 1,24E-04 |
| 197 | CELSR3    | ILMN_1691290 | 0,38 | 0,54 | 6,97E-05 |
| 198 | BIVM      | ILMN_1746666 | 0,38 | 0,49 | 1,50E-04 |
| 199 | DYNC2H1   | ILMN_1809954 | 0,38 | 0,47 | 6,59E-05 |
| 200 | C5ORF21   | ILMN_1654542 | 0,38 | 0,41 | 4,18E-04 |
| 201 | LOC645733 | ILMN_1672656 | 0,38 | 0,44 | 2,39E-05 |
| 202 | CCDC121   | ILMN_1666995 | 0,38 | 0,40 | 1,69E-04 |
| 203 | ITFG2     | ILMN_1701244 | 0,37 | 0,40 | 2,20E-04 |
| 204 | CABP4     | ILMN_1688864 | 0,37 | 0,40 | 8,11E-05 |
| 205 | C1ORF66   | ILMN_1791762 | 0,37 | 0,40 | 1,27E-04 |
| 206 | BTN3A2    | ILMN_1700067 | 0,37 | 0,52 | 7,71E-05 |
| 207 | BRMS1L    | ILMN_1775943 | 0,37 | 0,47 | 2,21E-04 |
| 208 | ST3GAL5   | ILMN_1713496 | 0,37 | 0,38 | 4,30E-04 |
| 209 | KDELC2    | ILMN_1651557 | 0,37 | 0,43 | 1,17E-05 |
| 210 | JAG2      | ILMN_1764729 | 0,37 | 0,39 | 1,10E-04 |
| 211 | ZNF532    | ILMN_1731358 | 0,37 | 0,47 | 5,58E-05 |
| 212 | TDRD3     | ILMN_1745811 | 0,37 | 0,44 | 2,88E-04 |
| 213 | TIGA1     | ILMN_1654609 | 0,37 | 0,58 | 3,80E-05 |
| 214 | CEP70     | ILMN_1741350 | 0,37 | 0,44 | 1,97E-04 |
| 215 | ZNF616    | ILMN_1719219 | 0,37 | 0,65 | 5,56E-05 |
| 216 | NPAT      | ILMN_1772165 | 0,36 | 0,44 | 3,05E-04 |
| 217 | HOXC4     | ILMN_1719975 | 0,36 | 0,47 | 3,95E-05 |
| 218 | LOC653066 | ILMN_1759870 | 0,36 | 0,40 | 2,20E-04 |
| 219 | LANCL1    | ILMN_1703697 | 0,36 | 0,40 | 4,87E-04 |
| 220 | TRIB1     | ILMN_1767754 | 0,36 | 0,42 | 5,89E-05 |
| 221 | FSCN1     | ILMN_1808707 | 0,36 | 0,44 | 3,41E-04 |
| 222 | HES1      | ILMN_1710284 | 0,36 | 0,49 | 1,06E-04 |
| 223 | TCEAL4    | ILMN_1748625 | 0,36 | 0,48 | 2,96E-05 |
| 224 | JUND      | ILMN_1810214 | 0,36 | 0,63 | 1,28E-05 |
| 225 | TTC30A    | ILMN_1735822 | 0,35 | 0,39 | 1,32E-04 |
| 226 | RETSAT    | ILMN_1789961 | 0,35 | 0,37 | 1,66E-04 |
| 227 | LARS      | ILMN_1757317 | 0,35 | 0,45 | 3,68E-05 |
| 228 | CTNNBIP1  | ILMN_1688103 | 0,35 | 0,48 | 1,58E-04 |
| 229 | HDAC6     | ILMN_1798546 | 0,35 | 0,46 | 5,91E-05 |
| 230 | MTMR4     | ILMN_1771019 | 0,35 | 0,43 | 4,74E-04 |
| 231 | AGK       | ILMN_1772645 | 0,35 | 0,42 | 1,32E-04 |
| 232 | GYS1      | ILMN_1711289 | 0,35 | 0,39 | 1,67E-04 |
| 233 | PPP1R9A   | ILMN_1785680 | 0,35 | 0,51 | 2,34E-04 |
| 234 | DAP3      | ILMN_1781680 | 0,35 | 0,35 | 4,29E-04 |

## Additional file 6: Downregulated genes

|     |           |              |      |      |          |
|-----|-----------|--------------|------|------|----------|
| 235 | HS.10862  | ILMN_1843198 | 0,35 | 0,50 | 3,57E-04 |
| 236 | MIPEP     | ILMN_1669070 | 0,35 | 0,50 | 4,48E-05 |
| 237 | ETS2      | ILMN_1745578 | 0,35 | 0,49 | 3,69E-05 |
| 238 | PRR11     | ILMN_1782403 | 0,35 | 0,45 | 2,21E-04 |
| 239 | MRP63     | ILMN_1774312 | 0,35 | 0,43 | 6,01E-05 |
| 240 | ABLIM1    | ILMN_1785424 | 0,34 | 0,35 | 2,65E-04 |
| 241 | FRAP1     | ILMN_1769031 | 0,34 | 0,35 | 2,69E-04 |
| 242 | MGC70857  | ILMN_1693862 | 0,34 | 0,36 | 5,28E-04 |
| 243 | DHTKD1    | ILMN_1664369 | 0,34 | 0,42 | 4,04E-04 |
| 244 | HS.560167 | ILMN_1881424 | 0,34 | 0,43 | 1,00E-04 |
| 245 | SPG11     | ILMN_1665049 | 0,34 | 0,50 | 1,86E-04 |
| 246 | FOXA2     | ILMN_1763712 | 0,34 | 0,37 | 2,78E-04 |
| 247 | LOC730256 | ILMN_1704014 | 0,34 | 0,60 | 1,61E-05 |
| 248 | C19ORF46  | ILMN_1801697 | 0,34 | 0,55 | 1,54E-05 |
| 249 | KIF15     | ILMN_1809440 | 0,33 | 0,37 | 4,48E-04 |
| 250 | HS.556255 | ILMN_1886515 | 0,33 | 0,37 | 2,31E-04 |
| 251 | DARS      | ILMN_1813836 | 0,33 | 0,35 | 3,15E-04 |
| 252 | C18ORF56  | ILMN_1796074 | 0,33 | 0,43 | 3,36E-04 |
| 253 | COCH      | ILMN_1711514 | 0,33 | 0,41 | 1,03E-04 |
| 254 | ALDH16A1  | ILMN_1776384 | 0,33 | 0,43 | 2,01E-04 |
| 255 | GTDC1     | ILMN_1762741 | 0,33 | 0,38 | 1,26E-04 |
| 256 | OMA1      | ILMN_1670079 | 0,33 | 0,34 | 1,32E-04 |
| 257 | ZNF295    | ILMN_1782110 | 0,33 | 0,52 | 8,02E-05 |
| 258 | MYB       | ILMN_1711894 | 0,33 | 0,40 | 8,89E-05 |
| 259 | ASPM      | ILMN_1815184 | 0,33 | 0,43 | 2,05E-04 |
| 260 | LOC440925 | ILMN_1663081 | 0,33 | 0,52 | 2,12E-05 |
| 261 | BICD2     | ILMN_1651375 | 0,33 | 0,36 | 3,15E-04 |
| 262 | MGC16169  | ILMN_1769601 | 0,33 | 0,47 | 1,88E-04 |
| 263 | KIF2A     | ILMN_1734476 | 0,32 | 0,35 | 2,94E-04 |
| 264 | NUBPL     | ILMN_1750412 | 0,32 | 0,37 | 2,57E-04 |
| 265 | SMARCA4   | ILMN_1814173 | 0,32 | 0,37 | 1,88E-04 |
| 266 | TGIF1     | ILMN_1702211 | 0,32 | 0,35 | 1,43E-04 |
| 267 | BAMBI     | ILMN_1691410 | 0,32 | 0,45 | 2,69E-04 |
| 268 | SFXN2     | ILMN_1795976 | 0,32 | 0,41 | 7,26E-05 |
| 269 | SEMA4F    | ILMN_1805007 | 0,32 | 0,40 | 2,01E-04 |
| 270 | HS.436379 | ILMN_1857897 | 0,32 | 0,36 | 3,98E-04 |
| 271 | HS.4988   | ILMN_1816244 | 0,32 | 0,58 | 8,03E-05 |
| 272 | NEIL2     | ILMN_1715680 | 0,32 | 0,36 | 3,57E-04 |
| 273 | ASH2L     | ILMN_1666933 | 0,32 | 0,39 | 6,35E-05 |
| 274 | PPP1R3F   | ILMN_1784822 | 0,32 | 0,42 | 2,67E-04 |
| 275 | NFIB      | ILMN_1778991 | 0,31 | 0,49 | 1,02E-04 |
| 276 | DPY19L3   | ILMN_1725072 | 0,31 | 0,53 | 3,12E-04 |
| 277 | WDR27     | ILMN_1688160 | 0,31 | 0,52 | 8,65E-05 |
| 278 | SHMT2     | ILMN_1661264 | 0,31 | 0,43 | 6,99E-05 |
| 279 | NGRN      | ILMN_1660345 | 0,31 | 0,37 | 3,41E-04 |
| 280 | C15ORF15  | ILMN_1803489 | 0,31 | 0,35 | 5,45E-04 |
| 281 | TTC23     | ILMN_1690320 | 0,31 | 0,66 | 1,15E-04 |

## Additional file 6: Downregulated genes

|     |           |              |      |      |          |
|-----|-----------|--------------|------|------|----------|
| 282 | TLOC1     | ILMN_1762003 | 0,31 | 0,50 | 9,38E-05 |
| 283 | ATP6V1B1  | ILMN_1812073 | 0,31 | 0,40 | 4,93E-04 |
| 284 | SLC7A1    | ILMN_1683859 | 0,31 | 0,34 | 5,88E-04 |
| 285 | LTA4H     | ILMN_1690342 | 0,30 | 0,39 | 9,61E-05 |
| 286 | ZKSCAN1   | ILMN_1727603 | 0,30 | 0,54 | 2,34E-04 |
| 287 | PDCD4     | ILMN_1768004 | 0,30 | 0,35 | 4,55E-04 |
| 288 | ATRN      | ILMN_1678541 | 0,30 | 0,39 | 2,38E-04 |
| 289 | LMCD1     | ILMN_1754969 | 0,30 | 0,34 | 4,24E-04 |
| 290 | VSIG2     | ILMN_1666536 | 0,30 | 0,39 | 2,12E-04 |
| 291 | FBXO4     | ILMN_1755811 | 0,30 | 0,31 | 4,86E-04 |
| 292 | MTIF2     | ILMN_1791403 | 0,30 | 0,37 | 4,73E-04 |
| 293 | LOC400566 | ILMN_1707137 | 0,30 | 0,34 | 8,83E-05 |
| 294 | OPLAH     | ILMN_1711030 | 0,30 | 0,33 | 2,37E-04 |
| 295 | SRD5A1    | ILMN_1793241 | 0,30 | 0,53 | 7,70E-05 |
| 296 | ACOT8     | ILMN_1679600 | 0,30 | 0,33 | 1,60E-04 |
| 297 | C14ORF105 | ILMN_1807667 | 0,30 | 0,49 | 4,32E-04 |
| 298 | ZNF318    | ILMN_1792305 | 0,30 | 0,39 | 1,18E-04 |
| 299 | HS.372654 | ILMN_1829989 | 0,30 | 0,44 | 4,86E-04 |
| 300 | HS.92308  | ILMN_1817255 | 0,30 | 0,34 | 4,58E-04 |
| 301 | BTN3A1    | ILMN_1802708 | 0,30 | 0,33 | 3,60E-04 |
| 302 | LOC153684 | ILMN_1782753 | 0,30 | 0,36 | 2,49E-04 |
| 303 | ATP9B     | ILMN_1658684 | 0,30 | 0,39 | 3,44E-04 |
| 304 | PLCL2     | ILMN_1737025 | 0,30 | 0,64 | 5,64E-05 |
| 305 | CFD       | ILMN_1777190 | 0,30 | 0,37 | 3,69E-04 |
| 306 | DDEFL1    | ILMN_1685441 | 0,30 | 0,59 | 9,29E-06 |
| 307 | SETDB2    | ILMN_1731644 | 0,29 | 0,36 | 4,63E-04 |
| 308 | KIAA1600  | ILMN_1752927 | 0,29 | 0,40 | 3,14E-04 |
| 309 | WDR71     | ILMN_1652753 | 0,29 | 0,32 | 2,01E-04 |
| 310 | EIF3S7    | ILMN_1739847 | 0,29 | 0,30 | 6,24E-04 |
| 311 | HS.567841 | ILMN_1895276 | 0,29 | 0,46 | 6,94E-05 |
| 312 | PIGZ      | ILMN_1790352 | 0,29 | 0,61 | 6,37E-05 |
| 313 | SDHA      | ILMN_1744210 | 0,29 | 0,32 | 3,37E-04 |
| 314 | API5      | ILMN_1815051 | 0,29 | 0,32 | 5,89E-04 |
| 315 | TANC1     | ILMN_1772278 | 0,29 | 0,59 | 2,25E-04 |
| 316 | OPN3      | ILMN_1716988 | 0,29 | 0,47 | 2,61E-04 |
| 317 | LOC730746 | ILMN_1679450 | 0,29 | 0,45 | 5,78E-04 |
| 318 | STAT5B    | ILMN_1777783 | 0,29 | 0,31 | 4,35E-04 |
| 319 | HIST1H2BD | ILMN_1651496 | 0,29 | 0,53 | 5,45E-05 |
| 320 | MAGED2    | ILMN_1683576 | 0,29 | 0,29 | 5,48E-04 |
| 321 | FLJ20444  | ILMN_1811181 | 0,28 | 0,31 | 3,63E-04 |
| 322 | MGC52110  | ILMN_1683065 | 0,28 | 0,38 | 4,21E-04 |
| 323 | CCDC109B  | ILMN_1801766 | 0,28 | 0,34 | 4,53E-04 |
| 324 | HOXA6     | ILMN_1815570 | 0,28 | 0,40 | 3,85E-04 |
| 325 | MPHOSPH9  | ILMN_1654421 | 0,28 | 0,47 | 3,60E-04 |
| 326 | ACAT1     | ILMN_1800008 | 0,28 | 0,36 | 5,15E-04 |
| 327 | ERN1      | ILMN_1698404 | 0,28 | 0,32 | 4,39E-04 |
| 328 | NLN       | ILMN_1742089 | 0,28 | 0,34 | 2,92E-04 |

## Additional file 6: Downregulated genes

|     |           |              |      |      |          |
|-----|-----------|--------------|------|------|----------|
| 329 | NARS2     | ILMN_1797332 | 0,28 | 0,45 | 1,99E-04 |
| 330 | GOLSYN    | ILMN_1738989 | 0,28 | 0,33 | 4,10E-04 |
| 331 | ALDH2     | ILMN_1793859 | 0,27 | 0,31 | 3,18E-04 |
| 332 | RNF41     | ILMN_1700345 | 0,27 | 0,47 | 3,01E-04 |
| 333 | HIST1H3G  | ILMN_1726815 | 0,27 | 0,35 | 2,63E-04 |
| 334 | LOC650215 | ILMN_1743711 | 0,27 | 0,34 | 2,75E-04 |
| 335 | CCT6B     | ILMN_1699610 | 0,27 | 0,31 | 7,76E-04 |
| 336 | LOC647340 | ILMN_1685774 | 0,27 | 0,46 | 1,55E-04 |
| 337 | ZBED3     | ILMN_1683215 | 0,27 | 0,38 | 3,25E-04 |
| 338 | SLC43A1   | ILMN_1765118 | 0,27 | 0,43 | 2,27E-04 |
| 339 | MAGED1    | ILMN_1762792 | 0,27 | 0,52 | 4,17E-04 |
| 340 | ALDH3A1   | ILMN_1702503 | 0,27 | 0,76 | 3,37E-04 |
| 341 | AASDH     | ILMN_1784269 | 0,26 | 0,31 | 3,22E-04 |
| 342 | WDR6      | ILMN_1669484 | 0,26 | 0,30 | 8,75E-04 |
| 343 | DYM       | ILMN_1680130 | 0,26 | 0,34 | 2,59E-04 |
| 344 | LOC283932 | ILMN_1710954 | 0,26 | 0,54 | 1,10E-04 |
| 345 | NMT2      | ILMN_1656378 | 0,25 | 0,35 | 3,35E-04 |
| 346 | RRM2B     | ILMN_1747763 | 0,25 | 0,74 | 2,19E-04 |
| 347 | HS.571151 | ILMN_1914800 | 0,24 | 0,61 | 3,04E-04 |
| 348 | MAPK12    | ILMN_1797786 | 0,24 | 0,40 | 1,54E-04 |
| 349 | PRKCA     | ILMN_1771800 | 0,24 | 0,46 | 4,23E-04 |
| 350 | ZYG11B    | ILMN_1656676 | 0,24 | 0,28 | 5,38E-04 |
| 351 | CENPE     | ILMN_1716279 | 0,24 | 0,55 | 4,77E-04 |
| 352 | PPP3CB    | ILMN_1802669 | 0,23 | 0,61 | 3,32E-04 |
| 353 | EPB41L5   | ILMN_1770245 | 0,23 | 0,29 | 4,45E-04 |
| 354 | HIST1H2AC | ILMN_1792689 | 0,23 | 0,79 | 1,02E-04 |
| 355 | LCN2      | ILMN_1692223 | 0,23 | 0,35 | 4,78E-04 |
| 356 | KLHL9     | ILMN_1664466 | 0,23 | 0,41 | 3,80E-04 |
| 357 | PHYH      | ILMN_1773073 | 0,23 | 0,40 | 1,91E-04 |
| 358 | HS.445274 | ILMN_1911717 | 0,23 | 0,54 | 3,88E-04 |
| 359 | CCNB2     | ILMN_1801939 | 0,23 | 0,35 | 2,81E-04 |
| 360 | HAGHL     | ILMN_1793201 | 0,22 | 0,35 | 3,11E-04 |
| 361 | CYP1B1    | ILMN_1693338 | 0,22 | 0,72 | 1,13E-04 |
| 362 | ZNF334    | ILMN_1672743 | 0,22 | 0,46 | 4,96E-04 |
| 363 | SH2D2A    | ILMN_1766319 | 0,22 | 0,54 | 5,83E-05 |
| 364 | BBS1      | ILMN_1800590 | 0,21 | 0,64 | 4,37E-04 |
| 365 | ZNF294    | ILMN_1760360 | 0,21 | 0,70 | 4,59E-04 |
| 366 | SIX5      | ILMN_1793672 | 0,20 | 0,47 | 3,32E-04 |
| 367 | HEBP1     | ILMN_1802557 | 0,20 | 0,39 | 2,33E-04 |
| 368 | CABC1     | ILMN_1731064 | 0,19 | 0,45 | 5,03E-04 |
| 369 | SH2B3     | ILMN_1752046 | 0,14 | 0,62 | 3,14E-04 |

<sup>1</sup>Score=(FC<sub>AC</sub>+FC<sub>BC</sub>)/2 - Stddev(FC<sub>AC</sub>,FC<sub>BC</sub>)

<sup>2</sup>LogFCmean=(FC<sub>AC</sub>+FC<sub>BC</sub>)/2

FC=Fold Change, Stddev = Standard deviation
