# Supplementary material for: Expression profiling and intracellular localization studies of the novel Proline-, Histidine-, and Glycine-rich protein 1 suggest an essential role in gastro-intestinal epithelium and a potential clinical application in colorectal cancer diagnostics
Source: Springer Nature journal article supplement (doi:10.1186/s12876-018-0752-8), 2018-02-07
Supplement: MOESM7 [file 15445836]

Additional file 7: Gene ontology analysis

| GO category | Up/Down | Overrepresented functional annotation          | GO ID      | Genes in GO | Genes in list | Percent | P-value | Adj. P-value |
|-------------|---------|------------------------------------------------|------------|-------------|---------------|---------|---------|--------------|
| GO_BP       | Up      | Establishment of localization                  | GO:0051234 | 95          | 356           | 26.7    | 2.5E-7  | 1.7E-4       |
| GO_BP       | Up      | Transport                                      | GO:0006810 | 94          | 356           | 26.4    | 2.4E-7  | 2.4E-4       |
| GO_BP       | Up      | Localization                                   | GO:0051179 | 102         | 356           | 28.7    | 2.1E-7  | 4.2E-4       |
| GO_BP       | Down    | Cellular amino acid metabolic process          | GO:0006520 | 19          | 303           | 6.3     | 1.1E-6  | 5.7E-4       |
| GO_BP       | Down    | Organic acid metabolic process                 | GO:0006082 | 32          | 303           | 10.6    | 6.5E-7  | 6.7E-4       |
| GO_BP       | Down    | Cellular ketone metabolic process              | GO:0042180 | 32          | 303           | 10.6    | 1.0E-6  | 7.0E-4       |
| GO_BP       | Down    | Carboxylic acid metabolic process              | GO:0019752 | 32          | 303           | 10.6    | 5.0E-7  | 1.0E-3       |
| GO_BP       | Down    | Oxoacid metabolic process                      | GO:0043436 | 32          | 303           | 10.6    | 5.0E-7  | 1.0E-3       |
| GO_BP       | Down    | Cellular amine metabolic process               | GO:0044106 | 21          | 303           | 6.9     | 2.8E-6  | 1.1E-3       |
| GO_BP       | Down    | System development                             | GO:0048731 | 62          | 303           | 20.5    | 1.3E-5  | 4.5E-3       |
| GO_BP       | Down    | Cellular amino acid and derivatives met. proc. | GO:0006519 | 21          | 303           | 6.9     | 3.4E-5  | 1.0E-2       |
| GO_BP       | Down    | Anatomical structure development               | GO:0048856 | 65          | 303           | 21.5    | 4.8E-5  | 1.3E-2       |
| GO_BP       | Down    | Amine metabolic process                        | GO:0009308 | 21          | 303           | 6.9     | 6.6E-5  | 1.5E-2       |
| GO_BP       | Down    | Developmental process                          | GO:0032502 | 76          | 303           | 25.1    | 7.4E-5  | 1.5E-2       |
| GO_BP       | Down    | G-protein coupled rec. pr. signaling pathway   | GO:0007186 | 16          | 303           | 5.3     | 1.0E-4  | 1.9E-2       |
| GO_BP       | Down    | Cell differentiation                           | GO:0030154 | 44          | 303           | 14.5    | 1.5E-4  | 2.5E-2       |
| GO_BP       | Down    | Cellular developmental process                 | GO:0048869 | 46          | 303           | 15.2    | 1.7E-4  | 2.6E-2       |
| GO_BP       | Down    | Multicellular organismal process               | GO:0032501 | 82          | 303           | 27.1    | 1.9E-4  | 2.9E-2       |
| GO_BP       | Down    | Multicellular organismal devel.                | GO:0007275 | 67          | 303           | 22.1    | 2.6E-4  | 3.5E-2       |
| GO_CC       | Up      | Plasma membrane                                | GO:0005886 | 107         | 356           | 30.1    | 3.7E-12 | 6.5E-10      |
| GO_CC       | Up      | Membrane part                                  | GO:0044425 | 178         | 356           | 50.0    | 3.7E-12 | 1.3E-9       |
| GO_CC       | Up      | Membrane                                       | GO:0016020 | 193         | 356           | 54.2    | 3.5E-11 | 4.0E-9       |
| GO_CC       | Up      | Plasma membrane part                           | GO:0044459 | 72          | 356           | 20.2    | 1.1E-8  | 9.3E-7       |
| GO_CC       | Up      | Extracellular region                           | GO:0005576 | 49          | 356           | 13.8    | 2.4E-8  | 1.4E-6       |
| GO_CC       | Up      | Intrinsic to membrane                          | GO:0031224 | 135         | 356           | 37.9    | 2.1E-8  | 1.5E-6       |
| GO_CC       | Up      | Integral to membrane                           | GO:0016021 | 131         | 356           | 36.8    | 4.0E-8  | 2.0E-6       |
| GO_CC       | Up      | Cell surface                                   | GO:0009986 | 17          | 356           | 4.8     | 7.9E-5  | 3.4E-3       |
| GO_CC       | Up      | Cell fraction                                  | GO:0000267 | 42          | 356           | 11.8    | 5.0E-4  | 1.9E-2       |
| GO_CC       | Up      | Intrinsic to plasma membrane                   | GO:0031226 | 31          | 356           | 8.7     | 8.0E-4  | 2.8E-2       |
| GO_CC       | Up      | Endoplasmic reticulum part                     | GO:0044432 | 22          | 356           | 6.2     | 1.0E-3  | 3.0E-2       |
| GO_CC       | Up      | Endoplasmic reticulum                          | GO:0005783 | 44          | 356           | 12.4    | 9.6E-4  | 3.0E-2       |
| GO_CC       | Up      | Integral to plasma membrane                    | GO:0005887 | 30          | 356           | 8.4     | 1.2E-3  | 3.1E-2       |
| GO_CC       | Up      | Proton-transporting V-type ATPase complex      | GO:0033176 | 5           | 356           | 1.4     | 1.6E-3  | 3.9E-2       |
| GO_CC       | Up      | Insoluble fraction                             | GO:0005626 | 32          | 356           | 9.0     | 2.3E-3  | 4.9E-2       |
