# Supplementary material for: Expression profiling and intracellular localization studies of the novel Proline-, Histidine-, and Glycine-rich protein 1 suggest an essential role in gastro-intestinal epithelium and a potential clinical application in colorectal cancer diagnostics
Source: Springer Nature journal article supplement (doi:10.1186/s12876-018-0752-8), 2018-02-07
Supplement: MOESM8 [file 15445836]

---

**Patient characteristics**

---

| <b>Parameter</b>                             | <b>Value</b> |
|----------------------------------------------|--------------|
| <b>Median age [years] (range)</b>            | 76 (21-93)   |
| <b>Gender - no. (%)</b>                      |              |
| Female                                       | 117 (56)     |
| Male                                         | 92 (44)      |
| <b>Tumor stage - no. (%)</b>                 |              |
| pT1                                          | 12 (6)       |
| pT2                                          | 36 (17)      |
| pT3                                          | 150 (72)     |
| pT4                                          | 11 (5)       |
| <b>Lymph node metastasis - no. (%)</b>       |              |
| pN0                                          | 145 (69)     |
| pN1                                          | 48 (23)      |
| pN2                                          | 15 (7)       |
| Unknown                                      | 1 (0)        |
| <b>Distant metastasis - no. (%)</b>          |              |
| M0                                           | 209 (100)    |
| M1                                           | 0 (0)        |
| <b>Tumor differentiation grade - no. (%)</b> |              |
| I                                            | 11 (5)       |
| II                                           | 146 (70)     |
| III                                          | 52 (25)      |

**Additional file 8: Clinicopathological data for the colorectal cancer patient cohort**
